# Supplementary material for: Role of HER2 mutations in refractory metastatic breast cancers: targeted sequencing results in patients with refractory breast cancer
Source: PubMed Central journal article supplement (PMC4741657; doi:10.18632/oncotarget.5184), 2015-09-11
Supplement: oncotarget-06-32027-s001.pdf [file oncotarget-06-32027-s001.pdf]

## SUPPLEMENTARY TABLES

Supplementary Table S1: SMC CancerSCAN v1.1

| Specification        |                                           |       |        |         |
|----------------------|-------------------------------------------|-------|--------|---------|
| <b>Target</b>        | 80 genes all exon + 5 genes translocation |       |        |         |
| <b>Target Size</b>   | 366.231 Kb                                |       |        |         |
| <b>Detection</b>     | SNV, small Indel, CNV, Translocation      |       |        |         |
| <b>SNV and CNV</b>   |                                           |       |        |         |
| ABL1                 | BRCA2                                     | FGFR2 | KIT    | PTCH1   |
| AKT1                 | CDH1                                      | FGFR3 | KRAS   | PTCH2   |
| AKT2                 | CDK4                                      | FLT3  | MDM2   | PTEN    |
| AKT3                 | CDK6                                      | GNA11 | MET    | PTPN11  |
| ALK                  | CDKN2A                                    | GNAQ  | MLH1   | RB1     |
| APC                  | CSF1R                                     | GNAS  | MPL    | RET     |
| ARID1A               | CTNNB1                                    | HNF1A | MTOR   | ROS1    |
| ARID1B               | DDR2                                      | HRAS  | NF1    | SMAD4   |
| ARID2                | EGFR                                      | IDH1  | NOTCH1 | SMARCB1 |
| ATM                  | EPHB4                                     | IDH2  | NPM1   | SMO     |
| ATRX                 | ERBB2                                     | IGF1R | NRAS   | SRC     |
| AURKA                | ERBB3                                     | ITK   | NTRK1  | STK11   |
| AURKB                | ERBB4                                     | JAK1  | PDGFRA | SYK     |
| BCL2                 | EZH2                                      | JAK2  | PDGFRB | TOP1    |
| BRAF                 | FBXW7                                     | JAK3  | PIK3CA | TP53    |
| BRCA1                | FGFR1                                     | KDR   | PIK3R1 | VHL     |
| <b>Translocation</b> |                                           |       |        |         |
| ALK                  | EWSR1                                     | ROS1  | RET    | TMPRSS2 |
| TERT*                |                                           |       |        |         |

**Supplementary Table S2: Sequences of target amplification primers and TaqMan probes for digital PCR**

| Assay name | Forward Primer<br>(5' -> 3') | Reverse Primer<br>(5' -> 3') | Mutant allele probe<br>(FAM-5' -> 3') | Wild-type allele probe<br>(VIC-5' -> 3') |
|------------|------------------------------|------------------------------|---------------------------------------|------------------------------------------|
| S72A       | ACCTACCTGCCCAACCAATG         | CGGGCCTCACCTGCA              | AGCCTGGCCTTCC                         | CAGCCTGTCCCTCC                           |
| S413L      | CTCTGCCTGCAGGTTACCTATAC      | GAGGTCAGGCAGGCTGT            | CGGCCATGCTAAGAT                       | CCGGCCATGCTGAGAT                         |
| Q692X      | CAGAAGATCCGGAAGTACACGAT      | GGGCTGGGAGGACTTCAC           | CTCCGTTTCCCTACAGCAGT                  | CCGTTTCCCTGCAGCAGT                       |
| P420fs     | GCAGGTTACCTATACATCTCAGCAT    | CGGATTACTTGCAGGTTCTGGAA      | CCTGCCGACCTCAG                        | CCTGCCCTGACCTCAG                         |
| P562S      | CCCCAGGGAGTATGTGAATGC        | AACAGGTCACTGAGCCATTCTG       | TGGCACGACAAAACA                       | TGGCACGGGCAAAACA                         |

**Supplementary Table S3: Sequencing QC metrics of 36 MBC tumor samples**

| Sample Name | GC (%) | Q30 (%) | Duplication (%) | OnTarget ( $\geq 100x$ ) (%) | OnBait (%) | Mean coverage |
|-------------|--------|---------|-----------------|------------------------------|------------|---------------|
| 188         | 45     | 90      | 15.2            | 99.1                         | 59.5       | 1024.7        |
| 191         | 46     | 90.6    | 13.7            | 99.0                         | 67.3       | 1079.8        |
| 200         | 45     | 90.2    | 13.0            | 99.1                         | 63.4       | 919.5         |
| 209         | 46     | 90.8    | 11.9            | 99.1                         | 67.9       | 947.4         |
| 226         | 46     | 89.4    | 14.1            | 99.2                         | 60.6       | 962.5         |
| 230         | 47     | 89.8    | 10.0            | 98.9                         | 66.0       | 973.6         |
| 235         | 45     | 91.4    | 21.9            | 99.0                         | 61.3       | 785.8         |
| 240         | 46     | 90.4    | 9.6             | 98.9                         | 64.2       | 964.6         |
| 244         | 45     | 91.7    | 12.1            | 98.8                         | 67.1       | 896.6         |
| 245         | 46     | 91.9    | 10.9            | 98.7                         | 66.1       | 927.7         |
| 250         | 44.5   | 91.7    | 12.5            | 98.8                         | 68.4       | 910           |
| 255         | 45     | 90.3    | 7.8             | 98.7                         | 58.7       | 837.9         |
| 256         | 47     | 90.8    | 21.6            | 98.8                         | 67.1       | 815.7         |
| 257         | 47     | 90.2    | 15.9            | 98.8                         | 65.7       | 840.4         |
| 259         | 46     | 91      | 34.9            | 99.1                         | 63.4       | 860.7         |
| 262         | 45     | 91.6    | 27.0            | 98.6                         | 71.1       | 973.7         |
| 263         | 46     | 91.1    | 15.8            | 99.1                         | 61.4       | 961.4         |
| 265         | 46.5   | 91.4    | 10.7            | 98.9                         | 65.0       | 1055.7        |
| 266         | 44     | 90.8    | 14.0            | 99.0                         | 64.3       | 890.4         |
| 287         | 44.5   | 91.1    | 10.9            | 98.9                         | 67.0       | 994           |
| 291         | 46     | 90.7    | 9.2             | 98.9                         | 67.0       | 1046.7        |
| 306         | 45.5   | 90.8    | 30.1            | 99.0                         | 65.9       | 785.3         |
| 173         | 46     | 93.1    | 11.5            | 99.2                         | 65.9       | 1193.6        |
| 181         | 45.5   | 92.8    | 12.2            | 99.3                         | 59.9       | 1296.6        |
| 228         | 45     | 92.7    | 14.7            | 99.0                         | 65.1       | 973.5         |
| 251         | 46     | 92.7    | 11.9            | 98.9                         | 67.1       | 1098.3        |
| 314         | 46     | 92.9    | 16.1            | 98.9                         | 62.3       | 1006.8        |
| 321         | 45     | 91.8    | 16.7            | 99.2                         | 60.9       | 1107.5        |
| 324         | 45     | 93      | 13.6            | 98.7                         | 59.3       | 846.3         |
| 333         | 45     | 92.7    | 9.4             | 98.8                         | 62.9       | 983.1         |
| 336         | 45     | 93.1    | 11.3            | 98.8                         | 61.2       | 931.9         |
| 337         | 45     | 92.8    | 12.0            | 99.0                         | 63.7       | 1018.3        |
| 349         | 46     | 92.6    | 20.6            | 99.6                         | 62.4       | 778.8         |
| 375         | 45.5   | 92.8    | 17.5            | 99.5                         | 53.7       | 750.9         |
| 410         | 46     | 92.8    | 21.3            | 99.6                         | 63.9       | 779.3         |
| 370         | 46     | 92.4    | 26.2            | 99.6                         | 57.0       | 667.1         |
| Mean        | 45.6   | 91.6    | 15.5            | 99.0                         | 63.7       | 941.3         |

**Supplementary Table S4: Comparison of HER2 mutation with TCGA data**

| Sample ID    | Protein Change | Mutation Type     | Vaf (%) | CNV (copy no.) |
|--------------|----------------|-------------------|---------|----------------|
| 226          | P420fs         | Frame Shift Del   | 0.2     | AMP (14.0)     |
| 240          | S413L          | Missense Mutation | 1.1     | AMP (16.4)     |
| 256          | S72A           | Missense Mutation | 0.8     | AMP (25.6)     |
| 251          | P562S          | Missense Mutation | 0.4     | AMP (19.7)     |
| 321          | Q692*          | Nonsense Mutation | 1.7     | AMP (5.3)      |
| 266          | <b>L755S</b>   | Missense Mutation | 19.0    | Diploid (2)    |
| TCGA-C8-A135 | D769H          | Missense Mutation | 53.0    | AMP (7.0)      |
| TCGA-A2-A3XV | S310F          | Missense Mutation | NA      | AMP (3.6)      |
| TCGA-EW-A1PD | H470Q          | Missense Mutation | NA      | Gain (2.7)     |
| TCGA-A8-A06Z | G309A          | Missense Mutation | NA      | Gain (2.7)     |
| TCGA-A8-A0A6 | L755S          | Missense Mutation | 41.9    | Gain (2.5)     |
| TCGA-E9-A1R5 | D769Y          | Missense Mutation | NA      | Gain (2.5)     |
| TCGA-D8-A1XM | <b>L755S</b>   | Missense Mutation | NA      | Gain (2.5)     |
| TCGA-A8-A0AB | <b>L755S</b>   | Missense Mutation | 50.5    | Gain (2.4)     |
| TCGA-BH-A18P | <b>L755S</b>   | Missense Mutation | 68.5    | Gain (2.4)     |
| TCGA-A2-A0T6 | R678Q          | Missense Mutation | 23      | Diploid (2)    |
| TCGA-A2-A0T6 | L755M          | Missense Mutation | NA      | Diploid (2)    |
| TCGA-A2-A0T6 | L755W          | Missense Mutation | NA      | Diploid (2)    |
| TCGA-A8-A08Z | V842I          | Missense Mutation | 40.6    | Diploid (2)    |
| TCGA-AC-A3YI | L755S          | Missense Mutation | NA      | Diploid (2)    |
| TCGA-AO-A128 | V797A          | Missense Mutation | NA      | Diploid (2)    |
| TCGA-BH-A0C1 | V777L          | Missense Mutation | 36.5    | Diploid (2)    |
| TCGA-BH-A1FE | D769Y          | Missense Mutation | NA      | Diploid (2)    |
| TCGA-C8-A274 | I767M          | Missense Mutation | NA      | Diploid (2)    |
| TCGA-OL-A5D6 | V777L          | Missense Mutation | NA      | Diploid (2)    |
| TCGA-AN-A046 | T306M          | Missense Mutation | NA      | Hetloss (1.8)  |
| TCGA-C8-A3M7 | S305C          | Missense Mutation | NA      | Hetloss (1.7)  |

**Supplementary Table S5: Gene expression differences of 43 genes in ERBB2/ERBB3 signaling pathway**

| Gene   | Avg (ERBB2 amp/<br>wild, n = 7) | Avg (ERBB2 amp/<br>mut, n = 4) | Fold Change | T-statistic | P-value |
|--------|---------------------------------|--------------------------------|-------------|-------------|---------|
| GRB2   | 0.922                           | 0.273                          | 0.648       | 2.669       | 0.026   |
| PIK3CB | 0.366                           | -0.553                         | 0.919       | 2.810       | 0.053   |
| RAF1   | 0.380                           | -0.061                         | 0.442       | 1.907       | 0.098   |
| DOCK7  | 0.274                           | -0.243                         | 0.517       | 1.843       | 0.098   |
| MAPK1  | -0.204                          | -0.873                         | 0.670       | 1.803       | 0.130   |
| ERBB3  | 1.673                           | 0.988                          | 0.685       | 1.640       | 0.148   |
| MAP2K2 | 0.006                           | 0.376                          | -0.370      | -1.541      | 0.158   |
| USP8   | 0.421                           | -0.030                         | 0.451       | 1.559       | 0.192   |
| BAD    | 0.762                           | 1.231                          | -0.468      | -1.280      | 0.236   |
| RAC1   | 0.905                           | 0.628                          | 0.276       | 1.342       | 0.247   |
| MAPK8  | 0.463                           | 0.192                          | 0.271       | 1.206       | 0.259   |
| PPP3CB | 1.038                           | 0.678                          | 0.359       | 1.274       | 0.270   |
| PIK3CA | 0.639                           | 0.227                          | 0.412       | 1.127       | 0.311   |
| MAPK9  | 0.784                           | 0.336                          | 0.448       | 1.063       | 0.328   |
| KRAS   | 0.525                           | 0.301                          | 0.224       | 1.024       | 0.332   |
| PIK3CD | 0.096                           | 0.455                          | -0.359      | -1.028      | 0.342   |
| NRG2   | -0.831                          | -0.317                         | -0.513      | -0.997      | 0.348   |
| CDC42  | 0.798                           | 0.414                          | 0.384       | 1.025       | 0.368   |
| PIK3R3 | 1.401                           | 1.094                          | 0.307       | 0.955       | 0.375   |
| SOS1   | 0.633                           | 0.412                          | 0.221       | 0.945       | 0.375   |
| HRAS   | 0.318                           | 0.703                          | -0.385      | -0.903      | 0.397   |
| PTPN11 | 0.382                           | 0.048                          | 0.334       | 0.900       | 0.405   |
| PRKACA | 0.510                           | 0.295                          | 0.215       | 0.827       | 0.447   |
| NRG1   | -1.032                          | -0.431                         | -0.600      | -0.838      | 0.455   |
| STAT3  | 1.181                           | 0.921                          | 0.259       | 0.718       | 0.500   |
| ERBB2  | 3.249                           | 3.527                          | -0.278      | -0.697      | 0.509   |
| CHRNA1 | 1.729                           | 2.027                          | -0.298      | -0.649      | 0.537   |
| SRC    | 0.542                           | 0.770                          | -0.228      | -0.637      | 0.547   |
| PIK3R1 | 2.348                           | 1.995                          | 0.353       | 0.558       | 0.602   |
| JAK2   | 0.438                           | 0.193                          | 0.245       | 0.559       | 0.602   |
| FOS    | 1.243                           | 0.813                          | 0.429       | 0.535       | 0.625   |
| MAPK10 | 1.573                           | 1.262                          | 0.311       | 0.465       | 0.658   |
| RNF41  | 1.059                           | 0.865                          | 0.194       | 0.479       | 0.658   |
| JUN    | 1.272                           | 1.450                          | -0.178      | -0.358      | 0.733   |

(Continued)

| Gene   | Avg (ERBB2 amp/<br>wild, <i>n</i> = 7) | Avg (ERBB2 amp/<br>mut, <i>n</i> = 4) | Fold Change | T-statistic | <i>P</i> -value |
|--------|----------------------------------------|---------------------------------------|-------------|-------------|-----------------|
| NF2    | -0.097                                 | -0.213                                | 0.116       | 0.336       | 0.752           |
| NRAS   | -1.006                                 | -1.100                                | 0.094       | 0.323       | 0.754           |
| MAP2K1 | -0.365                                 | -0.447                                | 0.083       | 0.290       | 0.787           |
| AKT1   | 0.421                                  | 0.552                                 | -0.131      | -0.248      | 0.816           |
| NFATC4 | 0.891                                  | 1.001                                 | -0.110      | -0.239      | 0.820           |
| CHRNE  | 0.685                                  | 0.742                                 | -0.057      | -0.184      | 0.862           |
| MAPK3  | 0.313                                  | 0.361                                 | -0.048      | -0.148      | 0.888           |
| SHC1   | 0.331                                  | 0.348                                 | -0.017      | -0.058      | 0.956           |
| PIK3R2 | 0.436                                  | 0.428                                 | 0.008       | 0.023       | 0.982           |

Among eleven ERBB2 amplified metastatic breast cancer patients, gene expression difference between ERBB2 wild type (*n* = 7) and ERBB2 mutated (*n* = 4) are compared
